# Supplementary material for: Alternative folding to a monomer or homopolymer is a common feature of the type 1 pilus subunit FimA from enteroinvasive bacteria
Source: PubMed Central journal article supplement (PMC6615685; doi:10.1074/jbc.ra119.008610), 2019-05-24
Supplement: supp_RA119.008610_144533_1_supp_334966_prql9m.pdf [file supp_RA119.008610_144533_1_supp_334966_prql9m.pdf]

# Alternative folding to a monomer or homopolymer is a common feature of the type 1 pilus subunit FimA from enteroinvasive bacteria

**Dawid S. Żyła<sup>1</sup>, Andrea E. Prota<sup>2</sup>, Guido Capitani<sup>2†</sup>, and Rudi Glockshuber<sup>1\*</sup>**

From the <sup>1</sup> Institute of Molecular Biology and Biophysics, ETH Zurich, Otto-Stern-Weg 5, CH-8093 Zurich, Switzerland; <sup>2</sup> Laboratory of Biomolecular Research, Division of Biology and Chemistry, Paul Scherrer Institute, Forschungsstrasse 111, CH-5232 Villigen PSI, Switzerland

<sup>†</sup>Deceased on 2 May 2017

---

## **Table of Contents**

1. Figures S1-S3

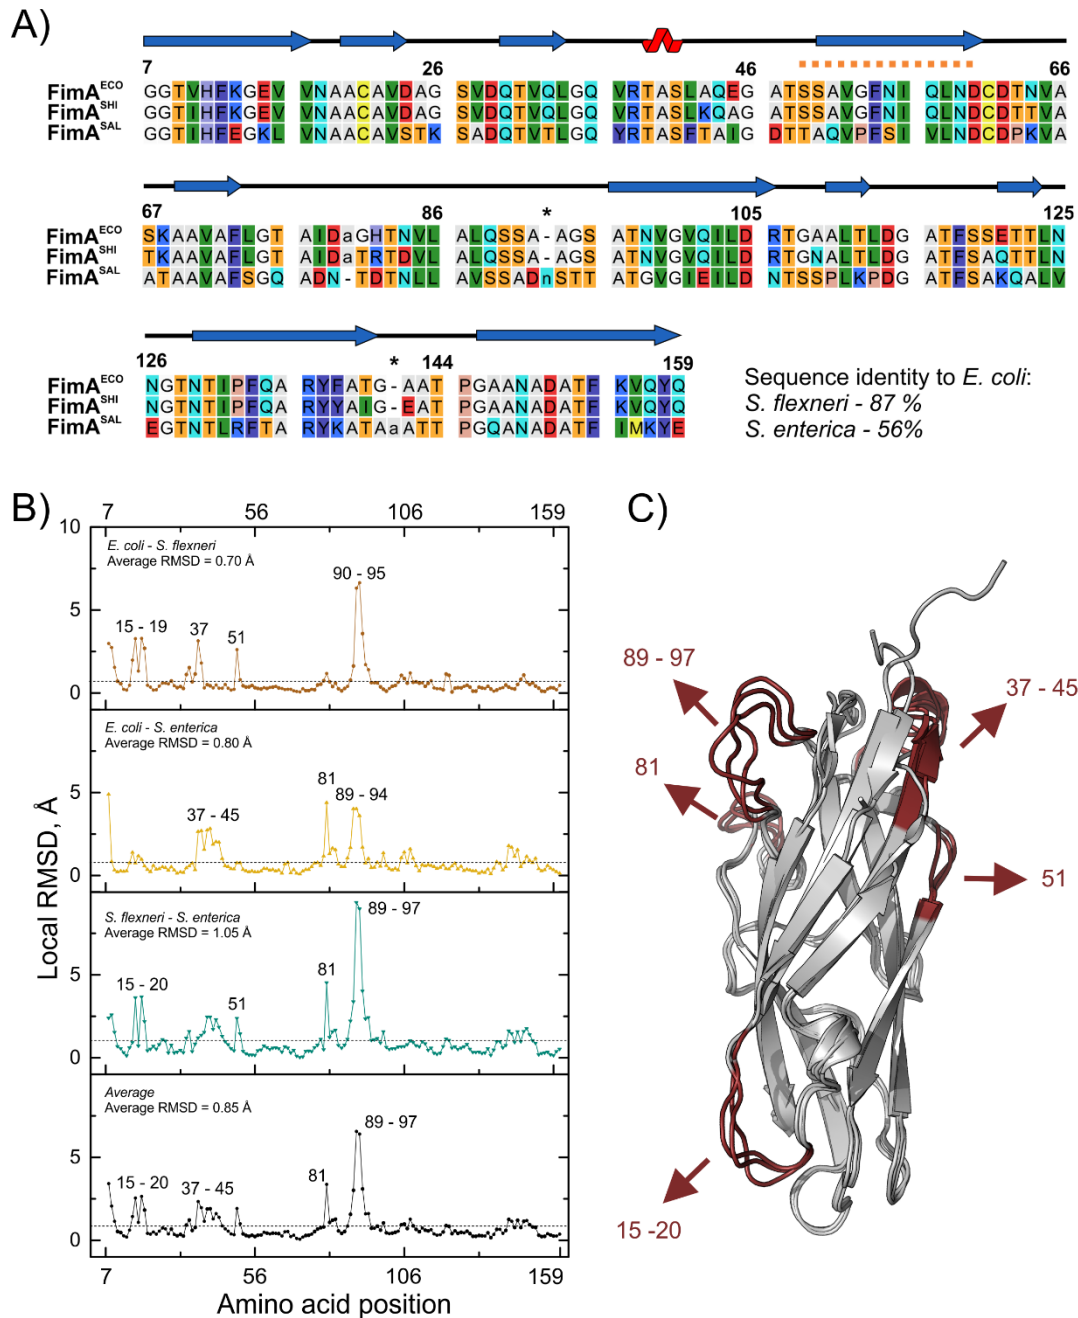

Figure S1: Pairwise structural alignment of the solved X-ray structures of the self-complemented monomers FimA<sup>ECO</sup>, FimA<sup>SHI</sup> and FimA<sup>SAL</sup>.

**A)** Structure-based sequence alignment of FimA<sup>ECO</sup>, FimA<sup>SHI</sup> and FimA<sup>SAL</sup> for the regions that were uniformly well resolved in the X-ray structures of all three. Secondary structures are indicated above the primary sequences. Amino acid numbering corresponds to mature *E. coli* FimA. Positions, where the sequences differ due to insertion of an additional residue (lower case letters), are marked with asterisks. The FimA fragment 50–60 that proved to be sufficient for targeting a GFP fusion protein to mitochondria is indicated as an orange dotted line [21].

**B)** The plot of the pairwise, local RMSD values against residue number.

**C)** Superposition of all solved structures. Polypeptide segments with the highest structural variability are highlighted in red.

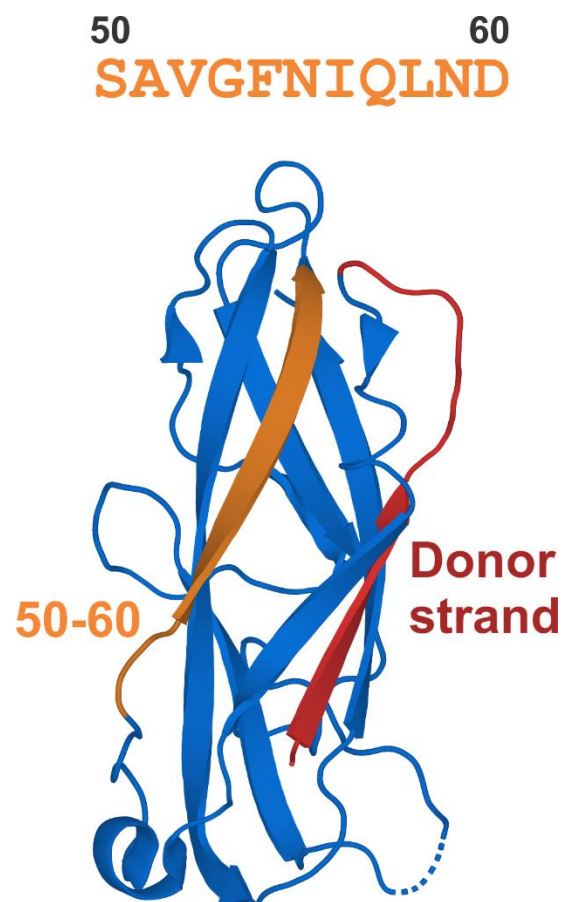

Figure S2: Localisation of the FimA anti-apoptotic peptide segment 50–60 in the context of the solved X-ray structure of FimA<sup>ECO</sup> (orange). The segment 50–60, which corresponds to the FimA  $\beta$ -strand (amino acid sequence indicated) proved to be sufficient to specifically target GFP to mitochondria when fused to the GFP N-terminus [21]. The self-complementing donor strand is coloured in red.

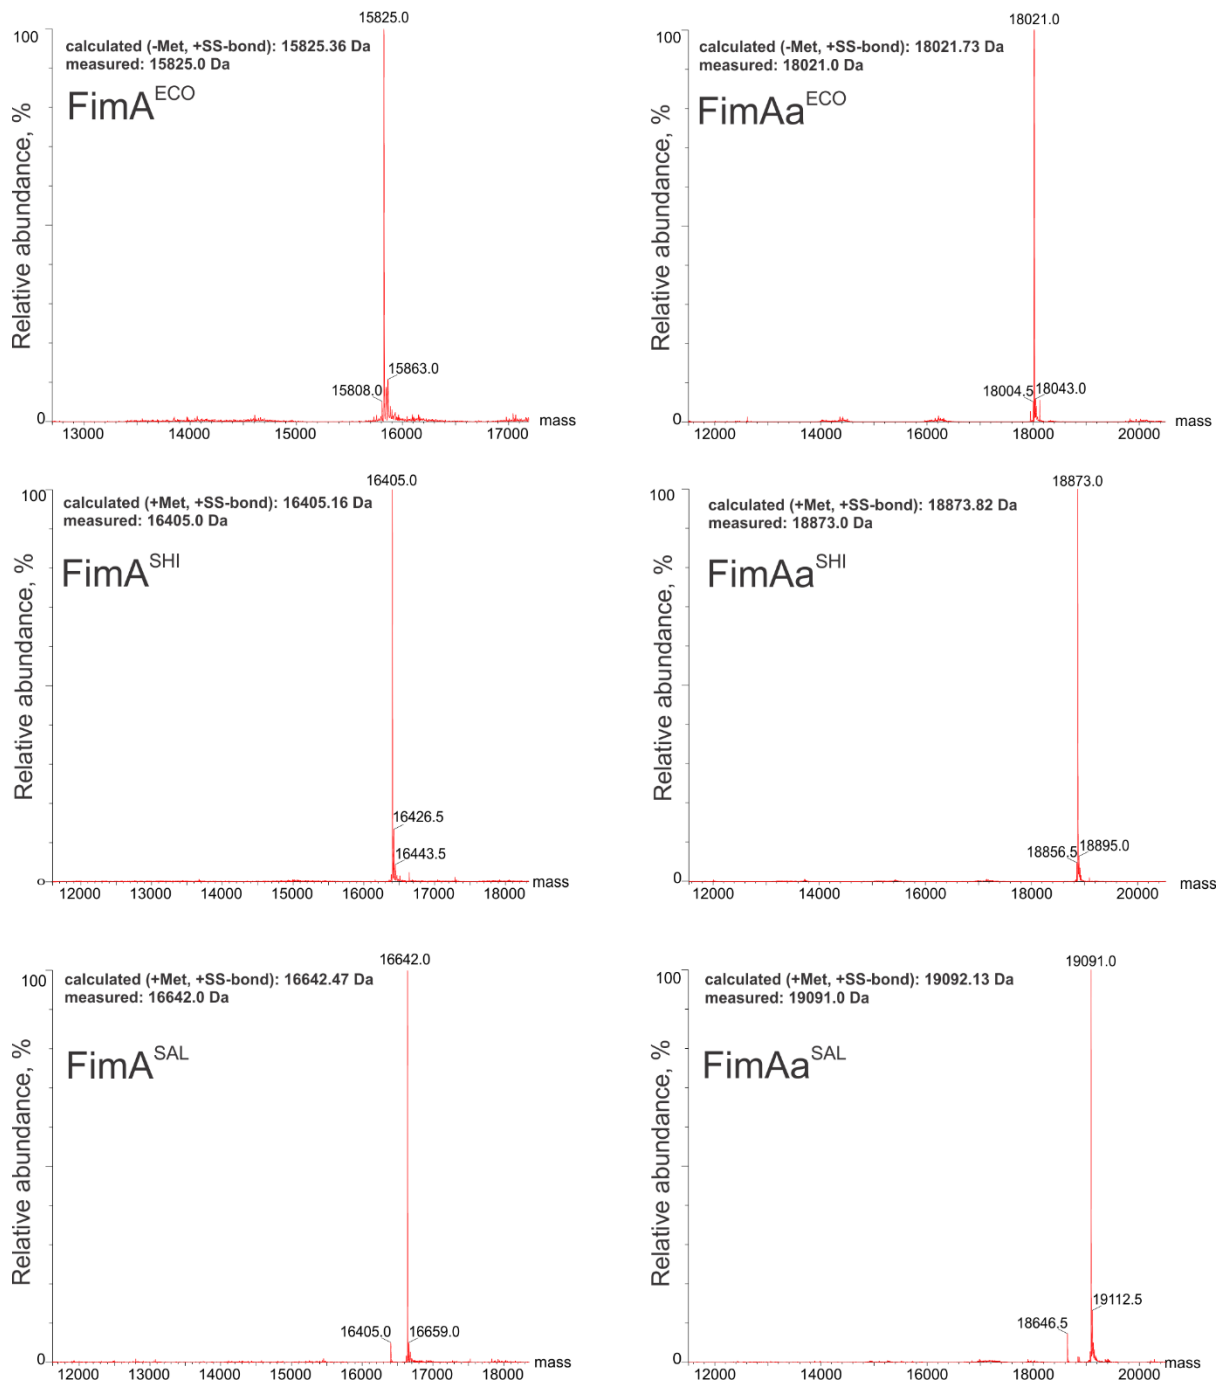

Figure S3: ESI-MS spectra of FimA and FimAa orthologues. All measured masses are consistent with calculated masses. All proteins contain a single disulfide bond. For FimA<sup>SHI</sup> and FimA<sup>SAL</sup> variants, the N-terminal methionine was not cleaved.
